# Supplementary material
Source: MDPI journal article supplement (https://www.mdpi.com/2571-905X/1/1/8)
Supplement: s1 [file s1]

# Supplementary Material

## 1. Derivation of the relationship between $S_{MS}$ and $F$

In the case of the randomised block design a considerable simplification of the CMH MS statistic is possible. In this case  $n_{i\bullet j} = 1$  for all  $i$  and  $j$ . Consequently  $n_{\bullet\bullet j} = t$ ,  $n_{i\bullet\bullet} = b$ ,  $n_{\bullet\bullet\bullet} = bt$  and  $p_{i\bullet j} = n_{i\bullet\bullet} / n_{\bullet\bullet\bullet} = 1/t$ . Substituting in the definitions given in Section 4 leads to

$$(t-1)S_j^2 = t \sum_h b_{hj}^2 n_{\bullet hj} - (\sum_h b_{hj} n_{\bullet hj})^2,$$

$$\text{cov}(M_j) = S_j^2 \{I_t - 1_t 1_t^T / t\} / t \text{ and}$$

$$\text{cov}(M) = \sum_{j=1}^b \text{cov}(M_j) = \{I_t - 1_t 1_t^T / t\} \sum_j S_j^2 / t.$$

Now  $1_t 1_t^T / t$  is idempotent, as is  $I_t - 1_t 1_t^T / t$ , and as any idempotent matrix is its own Moore-Penrose inverse

$$\text{cov}^-(M) = t \{I_t - 1_t 1_t^T / t\} / (\sum_j S_j^2).$$

In the definition of  $S_{MS}$ ,

$$M - E[M] = (\sum_j M_{ij}) - (\sum_{h,j} b_{hj} n_{\bullet hj}) / t.$$

Put  $V = (V_i) = M - E[M]$  so that  $V_i = M_{i\bullet} - \sum_{h,j} b_{hj} n_{\bullet hj} / t$ . The  $V_i$  are differences between the sum of the treatment scores over all strata and the mean of these. Now

$$1_t^T V = \sum_i (M_{ij} - E[M_{ij}]) = \sum_{h=1}^c b_{hj} n_{\bullet hj} - n_{\bullet\bullet j} \sum_{h=1}^c b_{hj} n_{\bullet hj} / n_{\bullet\bullet j} = 0.$$

It follows that

$$S_{MS} = V^T \text{cov}^-(M) V = t \{ \sum_i V_i^2 \} / \{ \sum_j S_j^2 \}.$$

To simplify this first put  $x_{ij} = \sum_h b_{hj} N_{ihj}$ . Note that  $x_{\bullet j} = \sum_h b_{hj} n_{\bullet hj}$ . On the  $j$ th block there is only one observation of treatment  $i$ , so for only one value of  $h$  is  $n_{ihj} = 1$ ; otherwise  $n_{ihj} = 0$ . Thus, for example,  $x_{ij}^2 = \sum_h b_{hj}^2 N_{ihj}$ . Consider the data set  $\{x_{ij}\}$ . For the two-way ANOVA of these data write  $TSS$  for the treatments sum of squares and  $ESS$  for the error sum of squares.

If the data  $\{x_{ij}\}$  are analysed as a one-way ANOVA or completely randomised design with blocks as treatments then the error sum of squares is  $TSS + ESS$  and is given by

$$\begin{aligned} TSS + ESS &= \sum_{i,j} (x_{ij} - x_{\bullet j} / t)^2 = \sum_{i,j} x_{ij}^2 - \sum_j x_{\bullet j}^2 / t = \sum_j \{ \sum_i x_{ij}^2 - x_{\bullet j}^2 / t \} = \\ &= \sum_j \{ \sum_i (\sum_h b_{hj}^2 N_{ihj}) - (\sum_h b_{hj} n_{\bullet hj})^2 / t \} = \sum_j \{ \sum_h b_{hj}^2 n_{\bullet hj} - (\sum_h b_{hj} n_{\bullet hj})^2 / t \} = \\ &= (t-1) \sum_j S_j^2 / t. \end{aligned}$$

Further, for the two-way ANOVA the treatment sum of squares is (note that  $\bar{x}$  means the mean of  $\{x_i\}$  while  $x_{\bullet}$  means the sum of the  $\{x_i\}$ )

$$\begin{aligned} TSS &= \sum_{i,j} (\bar{x}_{i\bullet} - \bar{x}_{\bullet\bullet})^2 = b \sum_i \{ x_{i\bullet} / b - x_{\bullet\bullet} / (bt) \}^2 \\ &= \frac{1}{b} \sum_i \{ \sum_{h,j} b_{hj} N_{ihj} - \sum_{h,j} b_{hj} n_{\bullet hj} / t \}^2 = \frac{1}{b} \sum_i V_i^2. \end{aligned}$$

It follows that

$$S_{MS} = t\{\sum_i V_i^2\} / \{\sum_j S_j^2\} = \frac{bt TSS}{t\{TSS + ESS\}/(t-1)} = \frac{b(t-1) F}{(b-1) + F}$$

on using  $TMS = TSS/(t-1)$ ,  $EMS = ESS/\{(b-1)(t-1)\}$  and  $F = TMS/EMS$ , the F test statistic for treatments in the two-way ANOVA.

## 2. Derivation of the CMH C test statistic with the same scores in every stratum

Suppose that the same treatment and response scores are used on each stratum or block. Then  $a_{ij} = a_i$  say, for all  $i$  and  $j$ , and  $b_{hj} = b_h$  say, for all  $h$  and  $j$ . As  $n_{i\bullet j} = 1$  for all  $i$  and  $j$ , and as a consequence  $n_{\bullet\bullet j} = t$  for all  $j$   $S_{XXj} = \sum_i a_{ij}^2 n_{i\bullet j} - (\sum_i a_{ij} n_{i\bullet j})^2 / n_{\bullet\bullet j} = \sum_i a_i^2 - (\sum_i a_i)^2 / t$ , which is independent of  $j$ , so we may write  $S_{XXj} = S_{XX}$ . It is *not* true that  $S_{YYj}$  is independent of  $j$ .

Next we focus on  $S_{YYj}$ . Put  $x_{ij} = \sum_h b_{hj} N_{ihj}$ . Then  $x_{ij}^2 = \sum_h b_{hj}^2 N_{ihj}$ . Consider the data set  $\{x_{ij}\}$ . If these are analysed as a one-way ANOVA or completely randomised design with blocks as treatments then the error sum of squares is

$$\begin{aligned} \sum_{i,j} (x_{ij} - \bar{x}_{\bullet j})^2 &= \sum_{i,j} x_{ij}^2 - t \sum_j \bar{x}_{\bullet j}^2 = \sum_j \{ \sum_i x_{ij}^2 - x_{\bullet j}^2 / t \} = \\ \sum_j \{ \sum_i (\sum_h b_{hj}^2 N_{ihj}) - (\sum_h b_{hj} n_{\bullet hj})^2 / t \} &= \sum_j \{ \sum_h b_{hj}^2 n_{\bullet hj} - (\sum_h b_{hj} n_{\bullet hj})^2 / t \} = \sum_j S_j^2. \end{aligned}$$

Finally we focus on  $S_{XYj}$ . Write  $\bar{a} = \sum_i a_i / t$ . Then

$$\sum_j C_j = \sum_{i,h,j} a_{ij} b_{hj} \{N_{ihj} - E[N_{ihj}]\} = \sum_{i,h,j} a_i b_{hj} \{N_{ihj} - n_{\bullet hj} / t\}.$$

Now

$$\sum_{i,h,j} \{a_i - \bar{a}\} b_{hj} \{N_{ihj} - n_{\bullet hj} / t\} = \sum_{i,h,j} \{a_i - \bar{a}\} b_h N_{ihj} - \sum_{i,h,j} \{a_i - \bar{a}\} b_{hj} n_{\bullet hj} / t.$$

Since

$$\sum_{i,h,j} \{a_i - \bar{a}\} b_{hj} n_{\bullet hj} / t = \sum_i \{a_i - \bar{a}\} \sum_h b_h \sum_j n_{\bullet hj} / t = \{ \sum_h n_{\bullet h} b_h \} \sum_i \{a_i - \bar{a}\} / t = 0$$

$$C = \sum_j C_j = \sum_i \{a_i - \bar{a}\} \sum_{h,j} b_h N_{ihj}.$$

Note that  $\sum_{h,j} b_h N_{ihj}$  is the sum of the  $i$ th treatment scores over responses and blocks, and these are usually easy to calculate directly or are readily available in most packaged analyses. The  $\{a_i - \bar{a}\}$  are the centred treatment scores. Thus

$$S_C = \frac{(t-1)C^2}{S_{XX}^2 \sum_j S_{YYj}^2}$$

in which  $C$  is the sum of the products of the treatment sums and the centred treatment scores,  $S_{XX}^2$  is the sum of the squares of the centred treatment scores and  $\sum_j S_{YYj}^2$  may be read from the output for a one-way ANOVA.
